# Supplementary material
Source: publisher figshare collection journal article supplement (https://acs.figshare.com/ndownloader/files/10748962)
Supplement: Supplementary file 1 [file 10748962]

# CIF-file generated for compound 6a                    R = 0.06
 
#==============================================================================
data_global
#==============================================================================
 
# 0. AUDIT DETAILS
 
_audit_creation_date                 'Jul 27 17:02:46 2017'
_audit_creation_method               'PLATON <TABLE ACC> option'
_audit_update_record
;
;
 
#===============================================================================
 
# 1. SUBMISSION DETAILS
 
_publ_contact_author_name           # Name of author for correspondence
;
'Dr. Atul Goel'
;
_publ_contact_author_address        # address of author for correspondence
;
Medicinal and Process Chemistry Division
CSIR-Central Drug Research Institute
Lucknow 226 021
India
;
 
_publ_contact_author_email           atul_goel@cdri.res.in
_publ_contact_author_fax             ?
_publ_contact_author_phone           ?
 
_publ_requested_journal              '?'
# Publication choise FI, CI or EI for Inorganic
#                    FM, CM or EM for Metal-organic
#                    FO, CO or EO for Organic
_publ_requested_category             FO
_publ_requested_coeditor_name        ?
 
_publ_contact_letter                # Include date of submission
;
Date of submission ?
 
?
;
 

 
#===============================================================================
 
# 2. PROCESSING SUMMARY (JOURNAL OFFICE ONLY)
 
_journal_date_recd_electronic        ?
 
_journal_date_to_coeditor            ?
_journal_date_from_coeditor          ?
_journal_date_accepted               ?
 
_journal_date_printers_first         ?
_journal_date_printers_final         ?
_journal_date_proofs_out             ?
_journal_date_proofs_in              ?
 
_journal_coeditor_name               ?
_journal_coeditor_code               ?
_journal_coeditor_notes
;
;
 
_journal_techeditor_code             ?
_journal_techeditor_notes
;
;
 
_journal_coden_ASTM                  ?
_journal_name_full                   ?
_journal_year                        ?
_journal_volume                      ?
_journal_issue                       ?
_journal_page_first                  ?
_journal_page_last                   ?
 
 
_journal_suppl_publ_number           ?
_journal_suppl_publ_pages            ?
 
 
#===============================================================================
 
# 3. TITLE AND AUTHOR LIST
 
_publ_section_title
;
;
_publ_section_title_footnote
;
;
 
# The loop structure below should contain the names and adresses of all
# authors, in the required order of publication. Repeat as necessary.
 
 
loop_
_publ_author_name
_publ_author_footnote
_publ_author_address

'Kant, Ruchir'
 Molecular and Structural Biology Division
 CSIR-Central Drug Research Institute
 Lucknow 226 021
 India


;
 'Goel, Atul'
 Medicinal and Process Chemistry Division
 CSIR-Central Drug Research Institute
 Lucknow 226 021
 India
;
 

#===============================================================================
 # start Validation Reply Form
_vrf_PLAT029_xxx
;
PROBLEM: _diffrn_measured_fraction_theta_full Low .......      0.840 Note  
RESPONSE: In this data the reported number of refelections  is less than 
the calculated number of refelections  for which the data 
completeness is 0.840. 
;
# end Validation Reply Form

 
#===============================================================================
 
data_xxx
 
#===============================================================================
 
# 5. CHEMICAL DATA
 
_chemical_name_systematic
;
;
_chemical_name_common                ?
_chemical_melting_point              ?
_chemical_formula_moiety
'C39 H35 N3 O'
# Ex: 'C12 H16 N2 O6, H2 O' and '(Cd 2+)3, (C6 N6 Cr 3-)2, 2(H2 O)'
_chemical_formula_structural         ?
_chemical_formula_sum
'C39 H35 N3 O'
_chemical_formula_iupac              ?
_chemical_formula_weight                561.70
_chemical_compound_source           'see text'
 
loop_
_atom_type_symbol
_atom_type_description
_atom_type_scat_dispersion_real
_atom_type_scat_dispersion_imag
_atom_type_scat_source
 O   O    0.0106    0.0060
 'International Tables Vol C Tables 4.2.6.8 and 6.1.1.4'
 N   N    0.0061    0.0033
 'International Tables Vol C Tables 4.2.6.8 and 6.1.1.4'
 H   H    0.0000    0.0000
 'International Tables Vol C Tables 4.2.6.8 and 6.1.1.4'
 C   C    0.0033    0.0016
 'International Tables Vol C Tables 4.2.6.8 and 6.1.1.4'
 
#===============================================================================
 
# 6. CRYSTAL DATA
 
_symmetry_cell_setting                  Triclinic
_symmetry_space_group_name_Hall      '-P 1'
_symmetry_space_group_name_H-M       'P -1'
_symmetry_Int_Tables_number                  2
 
loop_
_symmetry_equiv_pos_site_id
_symmetry_equiv_pos_as_xyz
   1 x,y,z
   2 -x,-y,-z
 
_cell_length_a                           10.262(4)
_cell_length_b                           11.055(4)
_cell_length_c                           14.296(5)
_cell_angle_alpha                       77.026(12)
_cell_angle_beta                        86.941(15)
_cell_angle_gamma                       88.442(17)
_cell_volume                            1578.0(10)
_cell_formula_units_Z                    2
_cell_measurement_temperature          293(2)
_cell_measurement_reflns_used       1284
_cell_measurement_theta_min          3.1
_cell_measurement_theta_max          25.3
_cell_special_details
;
;
 
_exptl_crystal_description          'Block'
_exptl_crystal_colour               'Colorless'
 
_exptl_crystal_size_max                  0.240
_exptl_crystal_size_mid                  0.200
_exptl_crystal_size_min                  0.170
_exptl_crystal_size_rad              ?
_exptl_crystal_density_meas          ?
_exptl_crystal_density_diffrn            1.182
_exptl_crystal_density_method       'Not Measured'
_exptl_crystal_F_000                       596
_exptl_absorpt_coefficient_mu            0.071
_exptl_absorpt_correction_type      'Multi-scan'
_exptl_absorpt_process_details     'REQAB (Rigaku, 1998)'
_exptl_absorpt_correction_T_min          0.983
_exptl_absorpt_correction_T_max          0.988
 
#===============================================================================
 
# 7. EXPERIMENTAL DATA
 
_exptl_special_details
;
;
_diffrn_ambient_temperature             293(2)
_diffrn_source_power                    0.0
_diffrn_source_voltage                  50.0
_diffrn_source_current                  0.6
_diffrn_radiation_wavelength            0.71075
_diffrn_radiation_type                  'Mo K\a'
_diffrn_source                          'MicroMax003_Mo'
_diffrn_radiation_monochromator         'Confocal'
_diffrn_measurement_specimen_support    'Fiber'
_diffrn_detector                        'CCD'
_diffrn_measurement_device
;
AFC12 (Right): Kappa 3 circle
;
_diffrn_measurement_device_type
;
Rigaku Saturn724+ (4x4 bin mode)
;
_diffrn_detector_area_resol_mean        28.5714
_diffrn_measurement_method              'profile data from \w-scans'

_diffrn_reflns_number             8417 
_diffrn_reflns_av_R_equivalents   0.0627 
_diffrn_reflns_av_sigmaI/netI     0.1110 
_diffrn_reflns_limit_h_min        -11 
_diffrn_reflns_limit_h_max        12 
_diffrn_reflns_limit_k_min        -13 
_diffrn_reflns_limit_k_max        13 
_diffrn_reflns_limit_l_min        -17 
_diffrn_reflns_limit_l_max        12 
_diffrn_reflns_theta_min          3.11 
_diffrn_reflns_theta_max          25.32 
_reflns_number_total              4840 
_reflns_number_gt                 1829 
_reflns_threshold_expression      >2sigma(I)
 
_diffrn_reflns_theta_full            25.32
_diffrn_measured_fraction_theta_max  0.840
_diffrn_measured_fraction_theta_full 0.840
_computing_data_collection
;
CrystalClear-SM Expert 2.1 b24 (Rigaku, 2012)
;
_computing_cell_refinement
;
CrystalClear-SM Expert 2.1 b24 (Rigaku, 2012)
;
_computing_data_reduction
;
CrystalClear-SM Expert 2.1 b24 (Rigaku, 2012)
;
_computing_structure_solution     'SHELXS-97 (Sheldrick, 1990)' 
_computing_structure_refinement   'SHELXL-97 (Sheldrick, 1997)' 
_computing_molecular_graphics     'SHELXTL (Bruker, 1997)'


#===============================================================================
 
# 8. REFINEMENT DATA
 
_refine_special_details
;
 Refinement on F^2^ for ALL reflections except those
 flagged by the user for potential systematic errors.
 Weighted R-factors wR and all goodnesses of fit S
 are based on F^2^, conventional R-factors R are based
 on F, with F set to zero for negative F^2^. The
 observed criterion of F^2^ > 2sigma(F^2^) is used only
 for calculating -R-factor-obs etc. and is not
 relevant to the choice of reflections for refinement.
 R-factors based on F^2^ are statistically about twice
 as large as those based on F, and R-factors based on
 ALL data will be even larger.
;
_refine_ls_structure_factor_coef  Fsqd  
_refine_ls_matrix_type            full 
_refine_ls_weighting_scheme       calc  
_refine_ls_weighting_details 
 'calc w=1/[\s^2^(Fo^2^)+(0.0705P)^2^+0.0000P] where P=(Fo^2^+2Fc^2^)/3' 
_atom_sites_solution_primary      direct 
_atom_sites_solution_secondary    difmap 
_atom_sites_solution_hydrogens    geom 
_refine_ls_hydrogen_treatment     constr 
_refine_ls_extinction_method      none 
_refine_ls_extinction_coef        ? 
_refine_ls_number_reflns          4840 
_refine_ls_number_parameters      388 
_refine_ls_number_restraints      0 
_refine_ls_R_factor_all           0.1621 
_refine_ls_R_factor_gt            0.0607 
_refine_ls_wR_factor_ref          0.1750 
_refine_ls_wR_factor_gt           0.1393 
_refine_ls_goodness_of_fit_ref    0.861 
_refine_ls_restrained_S_all       0.861 
_refine_ls_shift/su_max           0.000 
_refine_ls_shift/su_mean          0.000 
_refine_diff_density_max                 0.162
_refine_diff_density_min                -0.168
_refine_diff_density_rms                 0.037
 
#===============================================================================
 
# 9. ATOMIC COORDINATES AND DISPLACEMENT PARAMETERS
 
loop_
_atom_site_label
_atom_site_type_symbol
_atom_site_thermal_displace_type
_atom_site_fract_x
_atom_site_fract_y
_atom_site_fract_z
_atom_site_occupancy
_atom_site_U_iso_or_equiv
_atom_site_calc_flag
_atom_site_refinement_flags
O1 O Uani 0.6211(3) -0.4488(2) 1.0982(2) 1.000 0.0916(16) . .
N1 N Uani 0.1914(3) 0.2273(3) 1.1858(2) 1.000 0.0586(11) . .
N2 N Uani -0.0666(4) 0.3419(4) 1.0367(3) 1.000 0.1061(19) . .
N3 N Uani -0.2368(3) 0.2606(3) 0.4697(2) 1.000 0.0722(14) . .
C1 C Uani 0.2891(4) -0.0264(3) 1.0587(3) 1.000 0.0512(14) . .
C2 C Uani 0.2090(4) 0.0065(3) 0.9804(3) 1.000 0.0533(14) . .
C3 C Uani 0.1232(4) 0.1076(3) 0.9692(3) 1.000 0.0511(14) . .
C4 C Uani 0.1167(4) 0.1767(3) 1.0412(3) 1.000 0.0521(16) . .
C5 C Uani 0.2001(4) 0.1518(3) 1.1181(3) 1.000 0.0540(14) . .
C6 C Uani 0.2833(4) 0.0489(3) 1.1263(2) 1.000 0.0557(14) . .
C7 C Uani 0.3777(4) -0.1357(3) 1.0696(2) 1.000 0.0501(14) . .
C8 C Uani 0.4947(4) -0.1410(3) 1.1153(3) 1.000 0.0613(16) . .
C9 C Uani 0.5782(4) -0.2435(3) 1.1272(3) 1.000 0.0653(16) . .
C10 C Uani 0.5466(5) -0.3437(3) 1.0915(3) 1.000 0.0685(18) . .
C11 C Uani 0.4304(5) -0.3405(4) 1.0453(3) 1.000 0.081(2) . .
C12 C Uani 0.3486(4) -0.2388(4) 1.0351(3) 1.000 0.0727(17) . .
C13 C Uani 0.7417(5) -0.4566(4) 1.1419(3) 1.000 0.0891(19) . .
C14 C Uani 0.0159(4) 0.2700(4) 1.0388(3) 1.000 0.0653(17) . .
C15 C Uani 0.0439(4) 0.1444(3) 0.8850(3) 1.000 0.0579(14) . .
C16 C Uani 0.0453(4) 0.0960(3) 0.8084(3) 1.000 0.0585(14) . .
C17 C Uani -0.0312(4) 0.1363(3) 0.7237(2) 1.000 0.0528(14) . .
C18 C Uani -0.0013(4) 0.0899(3) 0.6418(3) 1.000 0.0629(16) . .
C19 C Uani -0.0678(4) 0.1305(3) 0.5587(3) 1.000 0.0620(16) . .
C20 C Uani -0.1692(4) 0.2163(3) 0.5552(3) 1.000 0.0581(16) . .
C21 C Uani -0.2019(4) 0.2610(3) 0.6364(3) 1.000 0.0687(17) . .
C22 C Uani -0.1340(4) 0.2222(3) 0.7188(3) 1.000 0.0645(17) . .
C23 C Uani -0.2585(5) 0.3907(4) 0.4386(3) 1.000 0.0629(17) . .
C24 C Uani -0.3792(5) 0.4377(5) 0.4127(3) 1.000 0.088(2) . .
C25 C Uani -0.3974(7) 0.5642(6) 0.3831(4) 1.000 0.130(3) . .
C26 C Uani -0.3004(11) 0.6422(6) 0.3814(4) 1.000 0.147(5) . .
C27 C Uani -0.1775(8) 0.5965(5) 0.4058(4) 1.000 0.128(3) . .
C28 C Uani -0.1566(5) 0.4696(4) 0.4344(3) 1.000 0.092(2) . .
C29 C Uani -0.2812(4) 0.1763(4) 0.4174(3) 1.000 0.0623(17) . .
C30 C Uani -0.2853(5) 0.2095(4) 0.3183(3) 1.000 0.093(2) . .
C31 C Uani -0.3331(6) 0.1271(6) 0.2681(4) 1.000 0.113(3) . .
C32 C Uani -0.3732(6) 0.0139(6) 0.3155(5) 1.000 0.112(3) . .
C33 C Uani -0.3676(5) -0.0218(4) 0.4127(4) 1.000 0.094(2) . .
C34 C Uani -0.3221(4) 0.0592(4) 0.4637(3) 1.000 0.0733(17) . .
C35 C Uani 0.2466(5) 0.1772(4) 1.2789(3) 1.000 0.086(2) . .
C36 C Uani 0.1936(6) 0.2537(4) 1.3505(3) 1.000 0.111(3) . .
C37 C Uani 0.2261(6) 0.3880(4) 1.3160(4) 1.000 0.110(3) . .
C38 C Uani 0.1769(5) 0.4369(4) 1.2165(3) 1.000 0.100(2) . .
C39 C Uani 0.2286(5) 0.3563(3) 1.1494(3) 1.000 0.0794(19) . .
H2 H Uiso 0.21350 -0.04090 0.93420 1.000 0.0640 calc R
H6 H Uiso 0.33680 0.02920 1.17820 1.000 0.0670 calc R
H8 H Uiso 0.51790 -0.07310 1.13870 1.000 0.0740 calc R
H9 H Uiso 0.65490 -0.24430 1.15920 1.000 0.0780 calc R
H11 H Uiso 0.40800 -0.40800 1.02100 1.000 0.0970 calc R
H12 H Uiso 0.27120 -0.23910 1.00420 1.000 0.0870 calc R
H13A H Uiso 0.78250 -0.53560 1.14140 1.000 0.1340 calc R
H13B H Uiso 0.72760 -0.44800 1.20700 1.000 0.1340 calc R
H13C H Uiso 0.79710 -0.39140 1.10700 1.000 0.1340 calc R
H15 H Uiso -0.01460 0.21000 0.88540 1.000 0.0690 calc R
H16 H Uiso 0.10150 0.02840 0.80860 1.000 0.0700 calc R
H18 H Uiso 0.06490 0.03040 0.64320 1.000 0.0760 calc R
H19 H Uiso -0.04420 0.09990 0.50460 1.000 0.0750 calc R
H21 H Uiso -0.27050 0.31800 0.63540 1.000 0.0820 calc R
H22 H Uiso -0.15750 0.25400 0.77230 1.000 0.0770 calc R
H24 H Uiso -0.44860 0.38450 0.41500 1.000 0.1060 calc R
H25 H Uiso -0.47910 0.59570 0.36390 1.000 0.1550 calc R
H26 H Uiso -0.31550 0.72740 0.36380 1.000 0.1770 calc R
H27 H Uiso -0.10900 0.65070 0.40300 1.000 0.1530 calc R
H28 H Uiso -0.07380 0.43810 0.45080 1.000 0.1100 calc R
H30 H Uiso -0.25600 0.28690 0.28510 1.000 0.1120 calc R
H31 H Uiso -0.33740 0.15040 0.20160 1.000 0.1360 calc R
H32 H Uiso -0.40510 -0.04050 0.28140 1.000 0.1340 calc R
H33 H Uiso -0.39430 -0.10070 0.44470 1.000 0.1120 calc R
H34 H Uiso -0.31890 0.03460 0.53020 1.000 0.0880 calc R
H35A H Uiso 0.34100 0.18130 1.27280 1.000 0.1040 calc R
H35B H Uiso 0.22270 0.09090 1.30190 1.000 0.1040 calc R
H36A H Uiso 0.09960 0.24530 1.35890 1.000 0.1330 calc R
H36B H Uiso 0.23070 0.22170 1.41240 1.000 0.1330 calc R
H37A H Uiso 0.31990 0.39780 1.31450 1.000 0.1320 calc R
H37B H Uiso 0.18620 0.43510 1.35990 1.000 0.1320 calc R
H38A H Uiso 0.20540 0.52160 1.19210 1.000 0.1200 calc R
H38B H Uiso 0.08230 0.43720 1.21950 1.000 0.1200 calc R
H39A H Uiso 0.19420 0.38690 1.08640 1.000 0.0950 calc R
H39B H Uiso 0.32300 0.36130 1.14270 1.000 0.0950 calc R
 
loop_
_atom_site_aniso_label
_atom_site_aniso_U_11
_atom_site_aniso_U_22
_atom_site_aniso_U_33
_atom_site_aniso_U_23
_atom_site_aniso_U_13
_atom_site_aniso_U_12
O1 0.099(3) 0.071(2) 0.113(3) -0.0381(18) -0.023(2) 0.0340(18)
N1 0.076(2) 0.0512(19) 0.053(2) -0.0195(16) -0.0104(18) -0.0001(16)
N2 0.090(3) 0.110(3) 0.140(4) -0.071(3) -0.040(3) 0.042(3)
N3 0.103(3) 0.052(2) 0.063(2) -0.0095(17) -0.038(2) 0.0104(19)
C1 0.050(3) 0.050(2) 0.055(2) -0.0150(19) -0.001(2) 0.0011(18)
C2 0.055(3) 0.057(2) 0.050(2) -0.0165(18) -0.007(2) 0.0064(19)
C3 0.052(3) 0.051(2) 0.052(2) -0.0143(19) -0.008(2) 0.0036(19)
C4 0.051(3) 0.048(2) 0.059(3) -0.0155(19) -0.009(2) 0.0103(18)
C5 0.055(3) 0.052(2) 0.056(2) -0.014(2) -0.004(2) 0.0026(19)
C6 0.061(3) 0.058(2) 0.049(2) -0.0129(19) -0.011(2) 0.007(2)
C7 0.055(3) 0.047(2) 0.049(2) -0.0129(18) -0.003(2) 0.0049(19)
C8 0.066(3) 0.058(2) 0.064(3) -0.020(2) -0.019(2) 0.009(2)
C9 0.068(3) 0.059(2) 0.069(3) -0.013(2) -0.018(2) 0.017(2)
C10 0.083(4) 0.046(2) 0.077(3) -0.017(2) -0.001(3) 0.013(2)
C11 0.080(4) 0.066(3) 0.109(4) -0.042(3) -0.018(3) 0.007(3)
C12 0.068(3) 0.070(3) 0.090(3) -0.036(2) -0.021(3) 0.011(2)
C13 0.093(4) 0.080(3) 0.088(3) -0.011(3) -0.001(3) 0.039(3)
C14 0.056(3) 0.073(3) 0.074(3) -0.030(2) -0.012(2) 0.005(2)
C15 0.060(3) 0.060(2) 0.055(2) -0.015(2) -0.011(2) 0.008(2)
C16 0.062(3) 0.061(2) 0.054(2) -0.015(2) -0.014(2) 0.014(2)
C17 0.062(3) 0.050(2) 0.047(2) -0.0105(18) -0.014(2) 0.0086(19)
C18 0.071(3) 0.058(2) 0.061(3) -0.016(2) -0.013(2) 0.016(2)
C19 0.076(3) 0.066(3) 0.049(2) -0.024(2) -0.009(2) 0.013(2)
C20 0.073(3) 0.049(2) 0.055(3) -0.015(2) -0.016(2) 0.007(2)
C21 0.075(3) 0.065(3) 0.068(3) -0.019(2) -0.019(2) 0.028(2)
C22 0.071(3) 0.067(3) 0.059(3) -0.022(2) -0.013(2) 0.020(2)
C23 0.075(3) 0.061(3) 0.051(3) -0.008(2) -0.013(2) 0.012(2)
C24 0.081(4) 0.099(4) 0.075(3) -0.004(3) -0.005(3) 0.025(3)
C25 0.169(7) 0.110(5) 0.100(5) -0.014(4) -0.001(5) 0.081(5)
C26 0.298(13) 0.069(4) 0.075(4) -0.019(4) -0.036(6) 0.070(6)
C27 0.227(8) 0.065(4) 0.088(4) 0.003(3) -0.043(4) -0.031(4)
C28 0.114(5) 0.067(3) 0.091(4) -0.004(3) -0.032(3) -0.006(3)
C29 0.068(3) 0.066(3) 0.055(3) -0.016(2) -0.018(2) 0.010(2)
C30 0.136(5) 0.082(3) 0.061(3) -0.013(3) -0.022(3) 0.019(3)
C31 0.150(6) 0.128(5) 0.075(4) -0.049(4) -0.044(4) 0.055(4)
C32 0.117(5) 0.116(5) 0.126(5) -0.067(4) -0.066(4) 0.037(4)
C33 0.095(4) 0.080(3) 0.117(4) -0.041(3) -0.026(3) 0.001(3)
C34 0.071(3) 0.077(3) 0.076(3) -0.024(3) -0.011(2) 0.000(2)
C35 0.126(5) 0.077(3) 0.063(3) -0.028(2) -0.019(3) 0.007(3)
C36 0.160(6) 0.110(4) 0.072(3) -0.038(3) -0.012(3) 0.010(4)
C37 0.167(6) 0.090(4) 0.086(4) -0.046(3) -0.025(4) 0.007(4)
C38 0.149(5) 0.066(3) 0.092(4) -0.034(3) -0.006(4) 0.005(3)
C39 0.104(4) 0.072(3) 0.067(3) -0.025(2) -0.007(3) -0.004(3)
 
#===============================================================================
 
# 10. MOLECULAR GEOMETRY
 
_geom_special_details
;
 Bond distances, angles etc. have been calculated using the
 rounded fractional coordinates. All su's are estimated
 from the variances of the (full) variance-covariance matrix.
 The cell esds are taken into account in the estimation of
 distances, angles and torsion angles
;
 
loop_
_geom_bond_atom_site_label_1
_geom_bond_atom_site_label_2
_geom_bond_distance
_geom_bond_site_symmetry_1
_geom_bond_site_symmetry_2
_geom_bond_publ_flag
 O1      C10        1.361(5)                     .       .                   yes
 O1      C13        1.408(6)                     .       .                   yes
 N1      C5         1.411(5)                     .       .                   yes
 N1      C35        1.460(5)                     .       .                   yes
 N1      C39        1.458(5)                     .       .                   yes
 N2      C14        1.142(6)                     .       .                   yes
 N3      C20        1.421(5)                     .       .                   yes
 N3      C23        1.422(6)                     .       .                   yes
 N3      C29        1.417(5)                     .       .                   yes
 C1      C2         1.400(6)                     .       .                   no
 C1      C6         1.408(5)                     .       .                   no
 C1      C7         1.477(5)                     .       .                   no
 C2      C3         1.390(5)                     .       .                   no
 C3      C4         1.411(5)                     .       .                   no
 C3      C15        1.464(6)                     .       .                   no
 C4      C5         1.403(6)                     .       .                   no
 C4      C14        1.437(6)                     .       .                   no
 C5      C6         1.391(5)                     .       .                   no
 C7      C8         1.391(6)                     .       .                   no
 C7      C12        1.385(6)                     .       .                   no
 C8      C9         1.387(5)                     .       .                   no
 C9      C10        1.373(5)                     .       .                   no
 C10     C11        1.390(7)                     .       .                   no
 C11     C12        1.370(6)                     .       .                   no
 C15     C16        1.322(6)                     .       .                   no
 C16     C17        1.456(5)                     .       .                   no
 C17     C18        1.397(5)                     .       .                   no
 C17     C22        1.394(5)                     .       .                   no
 C18     C19        1.382(6)                     .       .                   no
 C19     C20        1.384(5)                     .       .                   no
 C20     C21        1.383(6)                     .       .                   no
 C21     C22        1.379(6)                     .       .                   no
 C23     C24        1.367(7)                     .       .                   no
 C23     C28        1.370(7)                     .       .                   no
 C24     C25        1.378(9)                     .       .                   no
 C25     C26       1.330(12)                     .       .                   no
 C26     C27       1.379(13)                     .       .                   no
 C27     C28        1.384(7)                     .       .                   no
 C29     C30        1.384(6)                     .       .                   no
 C29     C34        1.380(6)                     .       .                   no
 C30     C31        1.393(8)                     .       .                   no
 C31     C32        1.346(9)                     .       .                   no
 C32     C33        1.361(9)                     .       .                   no
 C33     C34        1.380(7)                     .       .                   no
 C35     C36        1.537(6)                     .       .                   no
 C36     C37        1.496(7)                     .       .                   no
 C37     C38        1.512(7)                     .       .                   no
 C38     C39        1.516(6)                     .       .                   no
 C2      H2           0.9300                     .       .                   no
 C6      H6           0.9300                     .       .                   no
 C8      H8           0.9300                     .       .                   no
 C9      H9           0.9300                     .       .                   no
 C11     H11          0.9300                     .       .                   no
 C12     H12          0.9300                     .       .                   no
 C13     H13A         0.9600                     .       .                   no
 C13     H13B         0.9600                     .       .                   no
 C13     H13C         0.9600                     .       .                   no
 C15     H15          0.9300                     .       .                   no
 C16     H16          0.9300                     .       .                   no
 C18     H18          0.9300                     .       .                   no
 C19     H19          0.9300                     .       .                   no
 C21     H21          0.9300                     .       .                   no
 C22     H22          0.9300                     .       .                   no
 C24     H24          0.9300                     .       .                   no
 C25     H25          0.9300                     .       .                   no
 C26     H26          0.9300                     .       .                   no
 C27     H27          0.9300                     .       .                   no
 C28     H28          0.9300                     .       .                   no
 C30     H30          0.9300                     .       .                   no
 C31     H31          0.9300                     .       .                   no
 C32     H32          0.9300                     .       .                   no
 C33     H33          0.9300                     .       .                   no
 C34     H34          0.9300                     .       .                   no
 C35     H35A         0.9700                     .       .                   no
 C35     H35B         0.9700                     .       .                   no
 C36     H36A         0.9700                     .       .                   no
 C36     H36B         0.9700                     .       .                   no
 C37     H37A         0.9700                     .       .                   no
 C37     H37B         0.9700                     .       .                   no
 C38     H38A         0.9700                     .       .                   no
 C38     H38B         0.9700                     .       .                   no
 C39     H39A         0.9700                     .       .                   no
 C39     H39B         0.9700                     .       .                   no
 
loop_
_geom_angle_atom_site_label_1
_geom_angle_atom_site_label_2
_geom_angle_atom_site_label_3
_geom_angle
_geom_angle_site_symmetry_1
_geom_angle_site_symmetry_2
_geom_angle_site_symmetry_3
_geom_angle_publ_flag
 C10     O1      C13        119.1(3)             .       .       .           yes
 C5      N1      C35        117.2(3)             .       .       .           yes
 C5      N1      C39        115.7(3)             .       .       .           yes
 C35     N1      C39        110.6(3)             .       .       .           yes
 C20     N3      C23        118.4(3)             .       .       .           yes
 C20     N3      C29        120.3(3)             .       .       .           yes
 C23     N3      C29        121.3(3)             .       .       .           yes
 C2      C1      C6         117.8(3)             .       .       .           no
 C2      C1      C7         121.2(3)             .       .       .           no
 C6      C1      C7         121.1(3)             .       .       .           no
 C1      C2      C3         122.4(4)             .       .       .           no
 C2      C3      C4         117.7(4)             .       .       .           no
 C2      C3      C15        121.9(3)             .       .       .           no
 C4      C3      C15        120.4(3)             .       .       .           no
 C3      C4      C5         122.1(3)             .       .       .           no
 C3      C4      C14        118.7(4)             .       .       .           no
 C5      C4      C14        119.1(4)             .       .       .           no
 N1      C5      C4         119.1(3)             .       .       .           yes
 N1      C5      C6         123.1(3)             .       .       .           yes
 C4      C5      C6         117.7(3)             .       .       .           no
 C1      C6      C5         122.2(3)             .       .       .           no
 C1      C7      C8         121.9(3)             .       .       .           no
 C1      C7      C12        121.8(4)             .       .       .           no
 C8      C7      C12        116.3(3)             .       .       .           no
 C7      C8      C9         122.6(3)             .       .       .           no
 C8      C9      C10        119.5(4)             .       .       .           no
 O1      C10     C9         124.7(4)             .       .       .           yes
 O1      C10     C11        116.3(3)             .       .       .           yes
 C9      C10     C11        119.0(4)             .       .       .           no
 C10     C11     C12        120.7(4)             .       .       .           no
 C7      C12     C11        122.0(4)             .       .       .           no
 N2      C14     C4         178.2(5)             .       .       .           yes
 C3      C15     C16        128.0(4)             .       .       .           no
 C15     C16     C17        127.4(4)             .       .       .           no
 C16     C17     C18        119.9(3)             .       .       .           no
 C16     C17     C22        123.1(3)             .       .       .           no
 C18     C17     C22        117.0(3)             .       .       .           no
 C17     C18     C19        121.4(3)             .       .       .           no
 C18     C19     C20        120.7(4)             .       .       .           no
 N3      C20     C19        121.2(4)             .       .       .           yes
 N3      C20     C21        120.2(3)             .       .       .           yes
 C19     C20     C21        118.6(4)             .       .       .           no
 C20     C21     C22        120.8(4)             .       .       .           no
 C17     C22     C21        121.5(3)             .       .       .           no
 N3      C23     C24        120.9(4)             .       .       .           yes
 N3      C23     C28        119.3(4)             .       .       .           yes
 C24     C23     C28        119.8(4)             .       .       .           no
 C23     C24     C25        119.6(5)             .       .       .           no
 C24     C25     C26        121.3(7)             .       .       .           no
 C25     C26     C27        119.9(6)             .       .       .           no
 C26     C27     C28        119.7(6)             .       .       .           no
 C23     C28     C27        119.6(5)             .       .       .           no
 N3      C29     C30        120.8(4)             .       .       .           yes
 N3      C29     C34        121.1(4)             .       .       .           yes
 C30     C29     C34        118.2(4)             .       .       .           no
 C29     C30     C31        120.2(4)             .       .       .           no
 C30     C31     C32        120.2(5)             .       .       .           no
 C31     C32     C33        120.7(6)             .       .       .           no
 C32     C33     C34        119.9(5)             .       .       .           no
 C29     C34     C33        120.9(4)             .       .       .           no
 N1      C35     C36        108.8(4)             .       .       .           yes
 C35     C36     C37        111.3(4)             .       .       .           no
 C36     C37     C38        110.0(4)             .       .       .           no
 C37     C38     C39        110.1(4)             .       .       .           no
 N1      C39     C38        111.1(3)             .       .       .           yes
 C1      C2      H2           119.00             .       .       .           no
 C3      C2      H2           119.00             .       .       .           no
 C1      C6      H6           119.00             .       .       .           no
 C5      C6      H6           119.00             .       .       .           no
 C7      C8      H8           119.00             .       .       .           no
 C9      C8      H8           119.00             .       .       .           no
 C8      C9      H9           120.00             .       .       .           no
 C10     C9      H9           120.00             .       .       .           no
 C10     C11     H11          120.00             .       .       .           no
 C12     C11     H11          120.00             .       .       .           no
 C7      C12     H12          119.00             .       .       .           no
 C11     C12     H12          119.00             .       .       .           no
 O1      C13     H13A         109.00             .       .       .           no
 O1      C13     H13B         109.00             .       .       .           no
 O1      C13     H13C         109.00             .       .       .           no
 H13A    C13     H13B         110.00             .       .       .           no
 H13A    C13     H13C         110.00             .       .       .           no
 H13B    C13     H13C         109.00             .       .       .           no
 C3      C15     H15          116.00             .       .       .           no
 C16     C15     H15          116.00             .       .       .           no
 C15     C16     H16          116.00             .       .       .           no
 C17     C16     H16          116.00             .       .       .           no
 C17     C18     H18          119.00             .       .       .           no
 C19     C18     H18          119.00             .       .       .           no
 C18     C19     H19          120.00             .       .       .           no
 C20     C19     H19          120.00             .       .       .           no
 C20     C21     H21          120.00             .       .       .           no
 C22     C21     H21          120.00             .       .       .           no
 C17     C22     H22          119.00             .       .       .           no
 C21     C22     H22          119.00             .       .       .           no
 C23     C24     H24          120.00             .       .       .           no
 C25     C24     H24          120.00             .       .       .           no
 C24     C25     H25          119.00             .       .       .           no
 C26     C25     H25          119.00             .       .       .           no
 C25     C26     H26          120.00             .       .       .           no
 C27     C26     H26          120.00             .       .       .           no
 C26     C27     H27          120.00             .       .       .           no
 C28     C27     H27          120.00             .       .       .           no
 C23     C28     H28          120.00             .       .       .           no
 C27     C28     H28          120.00             .       .       .           no
 C29     C30     H30          120.00             .       .       .           no
 C31     C30     H30          120.00             .       .       .           no
 C30     C31     H31          120.00             .       .       .           no
 C32     C31     H31          120.00             .       .       .           no
 C31     C32     H32          120.00             .       .       .           no
 C33     C32     H32          120.00             .       .       .           no
 C32     C33     H33          120.00             .       .       .           no
 C34     C33     H33          120.00             .       .       .           no
 C29     C34     H34          120.00             .       .       .           no
 C33     C34     H34          120.00             .       .       .           no
 N1      C35     H35A         110.00             .       .       .           no
 N1      C35     H35B         110.00             .       .       .           no
 C36     C35     H35A         110.00             .       .       .           no
 C36     C35     H35B         110.00             .       .       .           no
 H35A    C35     H35B         108.00             .       .       .           no
 C35     C36     H36A         109.00             .       .       .           no
 C35     C36     H36B         109.00             .       .       .           no
 C37     C36     H36A         109.00             .       .       .           no
 C37     C36     H36B         109.00             .       .       .           no
 H36A    C36     H36B         108.00             .       .       .           no
 C36     C37     H37A         110.00             .       .       .           no
 C36     C37     H37B         110.00             .       .       .           no
 C38     C37     H37A         110.00             .       .       .           no
 C38     C37     H37B         110.00             .       .       .           no
 H37A    C37     H37B         108.00             .       .       .           no
 C37     C38     H38A         110.00             .       .       .           no
 C37     C38     H38B         110.00             .       .       .           no
 C39     C38     H38A         110.00             .       .       .           no
 C39     C38     H38B         110.00             .       .       .           no
 H38A    C38     H38B         108.00             .       .       .           no
 N1      C39     H39A         109.00             .       .       .           no
 N1      C39     H39B         109.00             .       .       .           no
 C38     C39     H39A         109.00             .       .       .           no
 C38     C39     H39B         109.00             .       .       .           no
 H39A    C39     H39B         108.00             .       .       .           no
 
loop_
_geom_torsion_atom_site_label_1
_geom_torsion_atom_site_label_2
_geom_torsion_atom_site_label_3
_geom_torsion_atom_site_label_4
_geom_torsion
_geom_torsion_site_symmetry_1
_geom_torsion_site_symmetry_2
_geom_torsion_site_symmetry_3
_geom_torsion_site_symmetry_4
_geom_torsion_publ_flag
 C13     O1      C10     C11        178.3(4)     .       .       .       .   no
 C13     O1      C10     C9          -2.1(6)     .       .       .       .   no
 C5      N1      C35     C36       -163.8(4)     .       .       .       .   no
 C35     N1      C5      C6         -15.8(6)     .       .       .       .   no
 C39     N1      C35     C36         60.7(5)     .       .       .       .   no
 C35     N1      C5      C4         160.8(4)     .       .       .       .   no
 C39     N1      C5      C4         -65.9(5)     .       .       .       .   no
 C39     N1      C5      C6         117.5(4)     .       .       .       .   no
 C35     N1      C39     C38        -61.5(5)     .       .       .       .   no
 C5      N1      C39     C38        162.2(4)     .       .       .       .   no
 C20     N3      C29     C30       -147.1(4)     .       .       .       .   no
 C20     N3      C29     C34         33.3(6)     .       .       .       .   no
 C29     N3      C23     C28       -131.7(4)     .       .       .       .   no
 C23     N3      C29     C30         33.0(6)     .       .       .       .   no
 C20     N3      C23     C28         48.4(5)     .       .       .       .   no
 C23     N3      C29     C34       -146.7(4)     .       .       .       .   no
 C23     N3      C20     C21         45.8(5)     .       .       .       .   no
 C23     N3      C20     C19       -132.6(4)     .       .       .       .   no
 C29     N3      C20     C19         47.5(5)     .       .       .       .   no
 C29     N3      C20     C21       -134.1(4)     .       .       .       .   no
 C29     N3      C23     C24         48.1(6)     .       .       .       .   no
 C20     N3      C23     C24       -131.8(4)     .       .       .       .   no
 C6      C1      C2      C3          -1.7(6)     .       .       .       .   no
 C7      C1      C6      C5        -179.5(4)     .       .       .       .   no
 C2      C1      C6      C5           1.1(6)     .       .       .       .   no
 C7      C1      C2      C3         178.9(4)     .       .       .       .   no
 C6      C1      C7      C12        150.5(4)     .       .       .       .   no
 C2      C1      C7      C12        -30.1(6)     .       .       .       .   no
 C6      C1      C7      C8         -29.3(5)     .       .       .       .   no
 C2      C1      C7      C8         150.1(4)     .       .       .       .   no
 C1      C2      C3      C15        177.4(4)     .       .       .       .   no
 C1      C2      C3      C4          -1.2(6)     .       .       .       .   no
 C4      C3      C15     C16        174.6(4)     .       .       .       .   no
 C2      C3      C15     C16         -3.9(7)     .       .       .       .   no
 C15     C3      C4      C14         10.4(6)     .       .       .       .   no
 C15     C3      C4      C5        -173.7(4)     .       .       .       .   no
 C2      C3      C4      C14       -171.0(4)     .       .       .       .   no
 C2      C3      C4      C5           4.9(6)     .       .       .       .   no
 C3      C4      C5      C6          -5.4(6)     .       .       .       .   no
 C14     C4      C5      C6         170.4(4)     .       .       .       .   no
 C14     C4      C5      N1          -6.3(6)     .       .       .       .   no
 C3      C4      C5      N1         177.8(4)     .       .       .       .   no
 N1      C5      C6      C1         179.0(4)     .       .       .       .   no
 C4      C5      C6      C1           2.4(6)     .       .       .       .   no
 C8      C7      C12     C11          0.0(6)     .       .       .       .   no
 C12     C7      C8      C9          -0.6(6)     .       .       .       .   no
 C1      C7      C12     C11       -179.8(4)     .       .       .       .   no
 C1      C7      C8      C9         179.2(4)     .       .       .       .   no
 C7      C8      C9      C10          1.1(6)     .       .       .       .   no
 C8      C9      C10     C11         -0.9(6)     .       .       .       .   no
 C8      C9      C10     O1         179.5(4)     .       .       .       .   no
 C9      C10     C11     C12          0.2(7)     .       .       .       .   no
 O1      C10     C11     C12        179.9(4)     .       .       .       .   no
 C10     C11     C12     C7           0.2(7)     .       .       .       .   no
 C3      C15     C16     C17       -177.8(4)     .       .       .       .   no
 C15     C16     C17     C22        -10.6(6)     .       .       .       .   no
 C15     C16     C17     C18        168.4(4)     .       .       .       .   no
 C18     C17     C22     C21         -0.9(6)     .       .       .       .   no
 C22     C17     C18     C19          2.1(6)     .       .       .       .   no
 C16     C17     C22     C21        178.1(4)     .       .       .       .   no
 C16     C17     C18     C19       -176.9(4)     .       .       .       .   no
 C17     C18     C19     C20         -1.9(6)     .       .       .       .   no
 C18     C19     C20     C21          0.4(6)     .       .       .       .   no
 C18     C19     C20     N3         178.8(4)     .       .       .       .   no
 N3      C20     C21     C22       -177.6(3)     .       .       .       .   no
 C19     C20     C21     C22          0.8(6)     .       .       .       .   no
 C20     C21     C22     C17         -0.5(6)     .       .       .       .   no
 C28     C23     C24     C25         -0.4(7)     .       .       .       .   no
 N3      C23     C24     C25        179.8(4)     .       .       .       .   no
 C24     C23     C28     C27          1.3(7)     .       .       .       .   no
 N3      C23     C28     C27       -178.9(4)     .       .       .       .   no
 C23     C24     C25     C26         -1.7(8)     .       .       .       .   no
 C24     C25     C26     C27          2.7(9)     .       .       .       .   no
 C25     C26     C27     C28         -1.7(9)     .       .       .       .   no
 C26     C27     C28     C23         -0.3(8)     .       .       .       .   no
 C30     C29     C34     C33         -0.9(7)     .       .       .       .   no
 C34     C29     C30     C31          1.8(7)     .       .       .       .   no
 N3      C29     C34     C33        178.8(4)     .       .       .       .   no
 N3      C29     C30     C31       -178.0(5)     .       .       .       .   no
 C29     C30     C31     C32         -1.3(9)     .       .       .       .   no
 C30     C31     C32     C33         -0.1(9)     .       .       .       .   no
 C31     C32     C33     C34          0.9(9)     .       .       .       .   no
 C32     C33     C34     C29         -0.4(7)     .       .       .       .   no
 N1      C35     C36     C37        -58.2(6)     .       .       .       .   no
 C35     C36     C37     C38         55.1(6)     .       .       .       .   no
 C36     C37     C38     C39        -53.9(6)     .       .       .       .   no
 C37     C38     C39     N1          57.3(5)     .       .       .       .   no
 
loop_
_geom_contact_atom_site_label_1
_geom_contact_atom_site_label_2
_geom_contact_distance
_geom_contact_site_symmetry_1
_geom_contact_site_symmetry_2
_geom_contact_publ_flag
 O1      H11          2.6100                     .     2_647                 no
 N2      C12        3.428(6)                     .     2_557                 no
 N2      H15          2.8900                     .       .                   no
 N2      H39A         2.8900                     .       .                   no
 N2      H13A         2.6500                     .     1_465                 no
 N2      H12          2.5700                     .     2_557                 no
 C1      C8         3.479(6)                     .     2_657                 no
 C2      C9         3.485(6)                     .     2_657                 no
 C2      C15        3.389(6)                     .     2_557                 no
 C2      C8         3.495(6)                     .     2_657                 no
 C3      C15        3.510(6)                     .     2_557                 no
 C3      C3         3.461(6)                     .     2_557                 no
 C3      C9         3.524(6)                     .     2_657                 no
 C8      C1         3.479(6)                     .     2_657                 no
 C8      C2         3.495(6)                     .     2_657                 no
 C9      C3         3.524(6)                     .     2_657                 no
 C9      C2         3.485(6)                     .     2_657                 no
 C12     N2         3.428(6)                     .     2_557                 no
 C14     C39        3.055(6)                     .       .                   no
 C15     C3         3.510(6)                     .     2_557                 no
 C15     C2         3.389(6)                     .     2_557                 no
 C19     C34        3.201(6)                     .       .                   no
 C21     C28        3.286(6)                     .       .                   no
 C24     C30        3.221(7)                     .       .                   no
 C28     C21        3.286(6)                     .       .                   no
 C30     C24        3.221(7)                     .       .                   no
 C33     C34        3.546(7)                     .     2_456                 no
 C34     C33        3.546(7)                     .     2_456                 no
 C34     C19        3.201(6)                     .       .                   no
 C39     C14        3.055(6)                     .       .                   no
 C2      H12          2.7200                     .       .                   no
 C2      H16          2.7000                     .       .                   no
 C3      H9           3.0600                     .     2_657                 no
 C4      H13C         2.9300                     .     2_657                 no
 C4      H39A         2.7000                     .       .                   no
 C6      H35A         2.9000                     .       .                   no
 C6      H35B         2.6900                     .       .                   no
 C6      H8           2.7200                     .       .                   no
 C8      H6           2.7200                     .       .                   no
 C8      H32          3.0700                     .     1_656                 no
 C9      H13C         2.7800                     .       .                   no
 C9      H13B         2.7600                     .       .                   no
 C12     H2           2.7200                     .       .                   no
 C13     H9           2.5500                     .       .                   no
 C14     H12          3.0800                     .     2_557                 no
 C14     H13C         2.8800                     .     2_657                 no
 C14     H15          2.4700                     .       .                   no
 C14     H39A         2.4800                     .       .                   no
 C15     H22          2.7700                     .       .                   no
 C16     H2           2.7300                     .       .                   no
 C17     H27          2.9800                     .     2_566                 no
 C18     H27          3.0300                     .     2_566                 no
 C18     H35B         3.0200                     .     2_557                 no
 C19     H34          2.9000                     .       .                   no
 C19     H19          3.0600                     .     2_556                 no
 C20     H28          2.7400                     .       .                   no
 C20     H34          2.6600                     .       .                   no
 C22     H15          2.7100                     .       .                   no
 C23     H21          2.7400                     .       .                   no
 C23     H30          2.6900                     .       .                   no
 C24     H13B         3.0800                     .     1_464                 no
 C24     H30          2.9500                     .       .                   no
 C25     H13B         2.7900                     .     1_464                 no
 C26     H13B         2.8800                     .     1_464                 no
 C29     H19          2.8100                     .       .                   no
 C29     H24          2.8300                     .       .                   no
 C30     H24          3.0400                     .       .                   no
 C33     H26          3.0400                     .     1_545                 no
 C34     H19          3.0100                     .       .                   no
 C35     H6           2.5400                     .       .                   no
 H2      C12          2.7200                     .       .                   no
 H2      C16          2.7300                     .       .                   no
 H2      H12          2.2700                     .       .                   no
 H2      H16          2.1600                     .       .                   no
 H6      C8           2.7200                     .       .                   no
 H6      C35          2.5400                     .       .                   no
 H6      H8           2.2600                     .       .                   no
 H6      H35A         2.3900                     .       .                   no
 H6      H35B         2.2900                     .       .                   no
 H8      C6           2.7200                     .       .                   no
 H8      H6           2.2600                     .       .                   no
 H8      H32          2.3300                     .     1_656                 no
 H9      C13          2.5500                     .       .                   no
 H9      H13B         2.3200                     .       .                   no
 H9      H13C         2.3700                     .       .                   no
 H9      C3           3.0600                     .     2_657                 no
 H11     O1           2.6100                     .     2_647                 no
 H12     C2           2.7200                     .       .                   no
 H12     H2           2.2700                     .       .                   no
 H12     N2           2.5700                     .     2_557                 no
 H12     C14          3.0800                     .     2_557                 no
 H13A    N2           2.6500                     .     1_645                 no
 H13A    H30          2.5200                     .     1_646                 no
 H13B    C9           2.7600                     .       .                   no
 H13B    C24          3.0800                     .     1_646                 no
 H13B    C25          2.7900                     .     1_646                 no
 H13B    C26          2.8800                     .     1_646                 no
 H13B    H9           2.3200                     .       .                   no
 H13C    C9           2.7800                     .       .                   no
 H13C    H9           2.3700                     .       .                   no
 H13C    C4           2.9300                     .     2_657                 no
 H13C    C14          2.8800                     .     2_657                 no
 H15     N2           2.8900                     .       .                   no
 H15     C14          2.4700                     .       .                   no
 H15     C22          2.7100                     .       .                   no
 H15     H22          2.2100                     .       .                   no
 H16     C2           2.7000                     .       .                   no
 H16     H2           2.1600                     .       .                   no
 H16     H18          2.4100                     .       .                   no
 H18     H16          2.4100                     .       .                   no
 H19     C29          2.8100                     .       .                   no
 H19     C34          3.0100                     .       .                   no
 H19     C19          3.0600                     .     2_556                 no
 H19     H19          2.3900                     .     2_556                 no
 H21     C23          2.7400                     .       .                   no
 H22     C15          2.7700                     .       .                   no
 H22     H15          2.2100                     .       .                   no
 H24     C29          2.8300                     .       .                   no
 H24     C30          3.0400                     .       .                   no
 H26     C33          3.0400                     .     1_565                 no
 H26     H33          2.5300                     .     1_565                 no
 H27     C17          2.9800                     .     2_566                 no
 H27     C18          3.0300                     .     2_566                 no
 H28     C20          2.7400                     .       .                   no
 H30     C23          2.6900                     .       .                   no
 H30     C24          2.9500                     .       .                   no
 H30     H13A         2.5200                     .     1_464                 no
 H32     C8           3.0700                     .     1_454                 no
 H32     H8           2.3300                     .     1_454                 no
 H33     H26          2.5300                     .     1_545                 no
 H34     C19          2.9000                     .       .                   no
 H34     C20          2.6600                     .       .                   no
 H35A    C6           2.9000                     .       .                   no
 H35A    H6           2.3900                     .       .                   no
 H35A    H37A         2.5900                     .       .                   no
 H35A    H39B         2.4100                     .       .                   no
 H35B    C6           2.6900                     .       .                   no
 H35B    H6           2.2900                     .       .                   no
 H35B    C18          3.0200                     .     2_557                 no
 H36A    H38B         2.5700                     .       .                   no
 H37A    H35A         2.5900                     .       .                   no
 H37A    H39B         2.5800                     .       .                   no
 H38B    H36A         2.5700                     .       .                   no
 H39A    N2           2.8900                     .       .                   no
 H39A    C4           2.7000                     .       .                   no
 H39A    C14          2.4800                     .       .                   no
 H39B    H35A         2.4100                     .       .                   no
 H39B    H37A         2.5800                     .       .                   no
 
loop_
_geom_hbond_atom_site_label_D
_geom_hbond_atom_site_label_H
_geom_hbond_atom_site_label_A
_geom_hbond_distance_DH
_geom_hbond_distance_HA
_geom_hbond_distance_DA
_geom_hbond_angle_DHA
_geom_hbond_site_symmetry_A
_geom_hbond_publ_flag
#
#D   H   A   D - H  H...A   D...A    D - H...A  symm(A)
#
C12     H12     N2          0.9300     2.5700   3.428(6)     154.00   2_557 yes
 
# Loop Mechanism for Extra Tables(s)
 
#loop_
#_publ_manuscript_incl_extra_item
#'_geom_extra_tableA_col_1'
#'_geom_extra_tableA_col_2'
#'_geom_extra_tableA_col_3'
#'_geom_extra_table_head_A'
#'_geom_table_footnote_A'
#'_geom_extra_tableB_col_1'
#'_geom_extra_tableB_col_2'
#'_geom_extra_tableB_col_3'
#'_geom_extra_table_head_B'
#'_geom_table_footnote_B'
 
 
#
#loop_
#_geom_extra_tableA_col_1
#_geom_extra_tableA_col_2
#_geom_extra_tableA_col_3
# ? ? ?
 
 
#
#loop_
#_geom_extra_tableB_col_1
#_geom_extra_tableB_col_2
#_geom_extra_tableB_col_3
# ? ? ?
 
 
#
#_geom_table_footnote_A
#;
# ?
#;
 
 
#
#_geom_table_footnote_B
#;
# ?
#;
 
 
#
#_geom_table_footnote_A
#;
# ?
#;
 
 
#
#_geom_table_footnote_B
#;
# ?
#;
 
 
#===END
